# Supplementary material
Source: Springer Nature journal article supplement (https://www.springermedizin.de/resource/supplementary/13075_2009_2769_MOESM1_ESM.pdf/9692840)

(a)

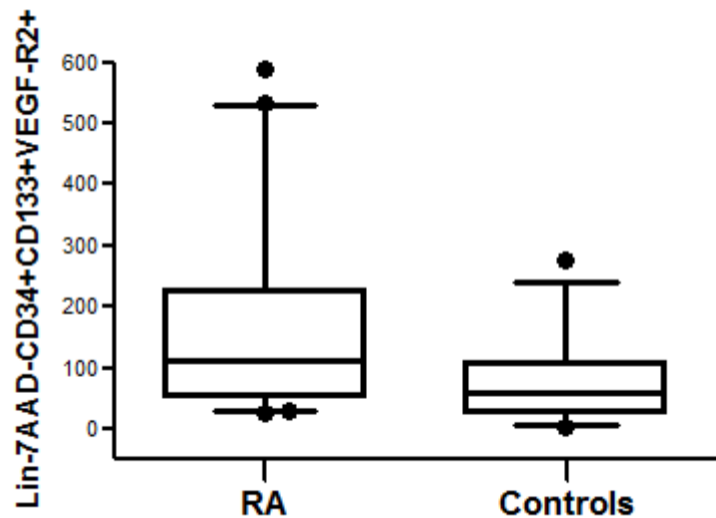

(b)

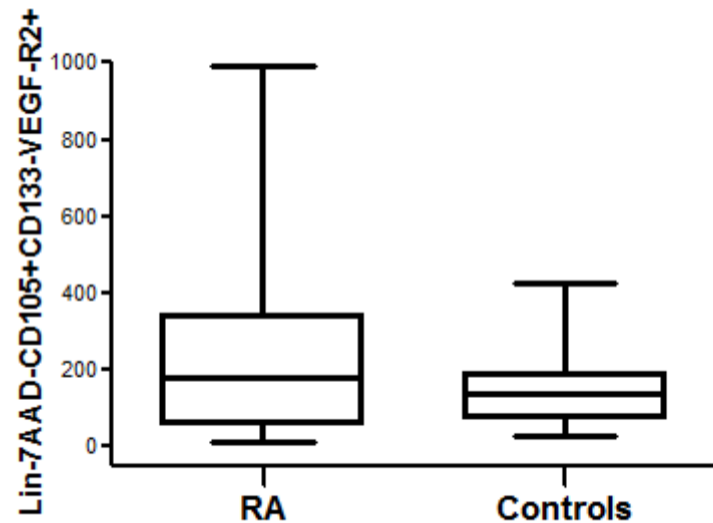

Supplement: MOESM1 [file 9692840]
